# Supplementary material for: Mapping the human genetic architecture of COVID-19: an update
Source: bioRxiv or medRxiv preprint supplement (doi:10.1101/2021.11.08.21265944), 2022-02-09

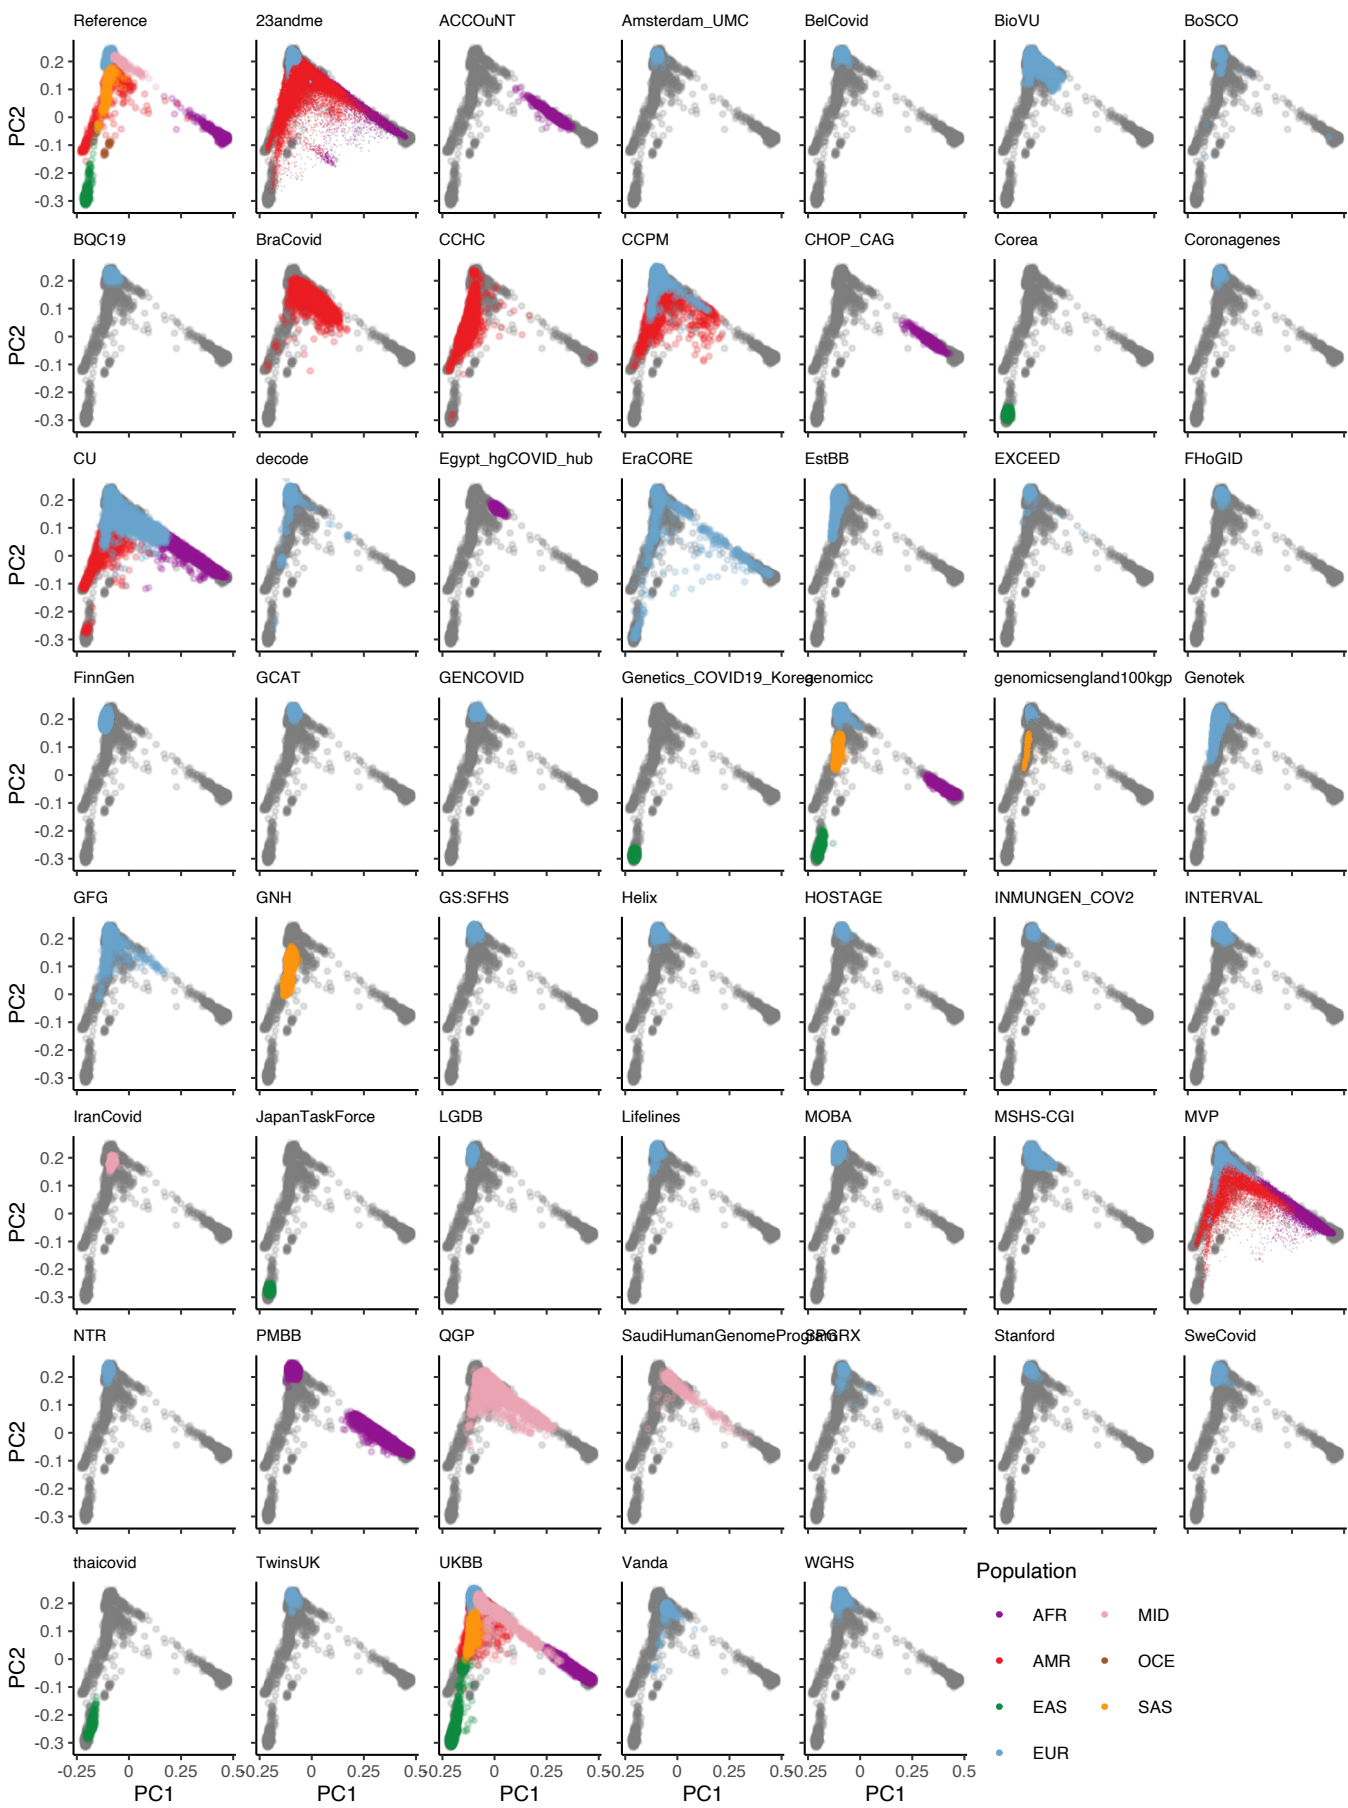

Supplement: Supplementary file [file media-5.pdf]
